# Supplementary material for: Capsazepine prolongation of the duration of lidocaine block of sensory transmission in mice may be mediated by modulation of HCN channel currents
Source: PeerJ. 2019 Jun 13;7:e7111. doi: 10.7717/peerj.7111 (PMC6571133; doi:10.7717/peerj.7111)
Supplement: Supplemental Information 1 — (I-V) Effect of CPZ on I-V curves of HCN1 and HCN2 channels. (Inhibition) CPZ concentration-dependently inhibited HCN channel currents expressed on HEK 293 cells. The inhibitory potency of CPZ on HCN channel currents is similar between HCN1 and HCN2 channels. (Activation) CPZ significantly hyperpolarized the voltage-dependent activation of HCN1 and HCN2 channels. [file peerj-07-7111-s001.xlsx]

## Sheet: I-V
HCN1	mV	mean	SEM			HCN2	mV	mean	SEM
contorl	-130	-1595.14	224.718			control	-130	-935.142	98.7183
	-120	-1313.93	261.762				-120	-653.934	101.762
	-110	-1056.41	143.411				-110	-406.413	83.411
	-100	-698.032	103.693				-100	-158.032	13.6934
	-90	-497.317	156.127				-90	-77.3168	15.1265
	-80	-324.234	85.1075				-80	-34.2343	18.1075
	-70	-154.494	39.6187				-70	-13.4937	9.61872
	-60	-57.7923	18.1446				-60	-10.7923	8.14462
	-50	-23.6309	4.32575				-50	-8.63092	4.32575
	-40	-15.0791	4.34587				-40	-9.07909	4.34587
CPZ	mV	mean	SEM			CPZ	mV	mean	SEM
	-130	-795.142	124.718				-130	-485.142	49.7183
	-120	-613.934	161.762				-120	-303.934	50.7624
	-110	-475.413	43.411				-110	-206.413	44.411
	-100	-298.032	63.6934				-100	-78.0319	18.6934
	-90	-167.317	56.1265				-90	-37.3168	13.1265
	-80	-104.234	75.1075				-80	-17.2343	12.1075
	-70	-74.4937	29.6187				-70	-16.4937	12.6187
	-60	-27.7923	16.1446				-60	-14.7923	7.14462
	-50	-13.6309	6.32575				-50	-7.63092	5.32575
	-40	-15.0791	7.34587				-40	-5.07909	4.34587

## Sheet: Inhibition
		uM	inhibition	SEM		IC50
HCN1		0.1	5.1	4		9.6
		1	15.2	3.6
		5	36.2	3.3
		10	58.2	12.6
		100	78.2	5.9
HCN2		uM	inhibition	SEM		IC50
		0.1	3.5	4		8.2
		1	18.6	5.6
		5	38.9	6.3
		10	65.5	10.5
		100	88.5	2.9

## Sheet: Activation
HCN1
control	mV	mean	SEM		CPZ	mV	mean	SEM
	-40	0.0368624	0.210716			-40	0.0168624	0.210716
	-50	0.0594189	0.21066			-50	0.0394189	0.21066
90mV	-60	0.0621657	0.211012		105	-60	0.0521657	0.211012
	-70	0.120687	0.193848			-70	0.110687	0.193848
	-80	0.223008	0.177637			-80	0.123008	0.177637
	-90	0.525743	0.158323			-90	0.225743	0.158323
	-100	0.853741	0.151938			-100	0.553741	0.151938
	-110	0.95428	0.127633			-110	0.85428	0.127633
	-120	0.986357	0.0938666			-120	0.926357	0.0938666
	-130	1.00048	0.0809953			-130	1.00048	0.0809953
HCN2
control	mV	mean	SEM		CPZ	mV	mean	SEM
100	-40	0.0368624	0.210716		115	-40	0.0168624	0.210716
	-50	0.033847	0.21066			-50	0.0394189	0.21066
	-60	0.0309759	0.211012			-60	0.0521657	0.211012
	-70	0.0532905	0.193848			-70	0.0506868	0.193848
	-80	0.0594189	0.177637			-80	0.0630082	0.177637
	-90	0.122574	0.158323			-90	0.0857433	0.158323
	-100	0.383741	0.151938			-100	0.153741	0.151938
	-110	0.75428	0.127633			-110	0.39428	0.127633
	-120	0.956357	0.0938666			-120	0.786357	0.0938666
	-130	1.00048	0.0809953			-130	1.00097	0.0809953
