# Supplementary material for: Capsazepine prolongation of the duration of lidocaine block of sensory transmission in mice may be mediated by modulation of HCN channel currents
Source: PeerJ. 2019 Jun 13;7:e7111. doi: 10.7717/peerj.7111 (PMC6571133; doi:10.7717/peerj.7111)
Supplement: Supplemental Information 2 — (Duration) Durations of sciatic nerve block produced by different drug combinations. (Time courses) The time courses of regional anesthetic effects by different tests. [file peerj-07-7111-s002.xlsx]

## Sheet: Duration
Pin duration	Lidocaine	lido+CPZ	lido+ZD	lido+CPZ+for	lido+CPZ+ZD
	20	40	27	18	28
	22	35	32	19	29
	23	36	38	15	41
	18	38	45	17	28
	22	36	36	25	34
	19	33	32	21	31
	19	35	34	20	48
	19	28	30	16	21
mean	20.25	35.125	34.25	18.875	32.5
sem	1.71391	3.33307	5.16599	2.97647	7.92149
Vonfrey duration	Lidocaine	lido+CPZ	lido+ZD	lido+CPZ+for
	26	23	22	7
	15	24	32	17
	22	22	25	19
	22	29	31	17
	23	23	21	23
	15	24	27	23
	20	23	22	23
	17	36	20	19
mean	20	25.5	25	18.5
sem	3.74166	4.4441	4.30116	4.97494
Thermal duration	Lidocaine	lido+CPZ	lido+ZD	lido+CPZ+for
	31	35	30	17
	25	52	28	27
	26	34	40	31
	21	35	28	21
	23	34	34	22
	27	47	40	34
	39	36	35	23
	22	44	32	23
mean	26.75	39.625	33.375	24.75
sem	5.49432	6.57529	4.49826	5.21416
Motor duration	Lidocaine	lido+CPZ	lido+ZD	lido+CPZ+for
	29	32	31	15
	15	33	29	22
	22	27	23	18
	22	31	29	15
	23	33	23	21
	17	22	29	22
	22	28	23	23
	17	23	36	21
mean	20.875	28.625	27.875	19.625
sem	4.16646	4.09077	4.34274	2.99739

## Sheet: Time courses
Pin recovery (%)
Time (min)	Lido	+ZD7288	+CPZ	+CPZ+forskolin	+CPZ+ZD7288
-5	0	0	0	0	0
0	100	100	100	100	100
5	100	100	100	100	100
10	100	100	100	100	100
15	100	100	100	100	100
20	50	100	100	40	90
25	0	100	90	10	80
30	0	90	90	0	50
35	0	40	40	0	50
40	0	10	10	0	20
45	0	0	0	0	0
50	0	0	0	0	0
Motor recovery (%)
Time (min)	Lido	+ZD7288	+CPZ	+CPZ+forskolin
-5	0	0	0	0
0	100	100	100	100
5	100	100	100	100
10	100	100	100	100
15	100	100	100	90
20	60	70	100	50
25	10	30	60	0
30	0	10	20	0
35	0	0	10	0
40	0	0	0	0
45	0	0	0	0
50	0	0	0	0
Von recovery
Time (min)	Lido								+ZD7288								+CPZ								+CPZ+forskolin
-5	0	0	0	0	0	0	0	0	0	0	0	0	0	0	0	0	0	0	0	0	0	0	0	0	0	0	0	0	0	0	0	0
0	3	3.84	3.84	3.84	3.84	3.84	3.84	3.84	3.4	3.84	3.84	3.84	3.93	3.93	3.96	3.84	3.4	3.4	3	3.84	3.84	3.84	3.93	3.84	3.6	3.4	3.84	3.4	3.98	3.84	3.6	3.84
5	3	3.84	3.84	3.84	3.84	3.84	3.84	3.84	3.84	3.84	3.84	3.84	3.84	3.84	3.84	3.84	3.4	3.4	3	3.84	3.84	3.84	3.93	3.84	3.6	3.4	3.84	3.4	3.98	3.84	3.6	3.84
10	3	3.84	3.84	3.84	3.84	3.84	3.84	3.84	3.4	3.84	3.84	3.84	3.84	3.84	3.96	3.84	3.4	3.4	3	3.84	3.84	3.84	3.93	3.84	0.2	3.4	3.84	1.4	3.98	3.84	3.6	3.84
15	3	1.84	1.84	3.84	3.84	0	3.84	3.84	0	3.84	1.84	3.84	3.93	3.84	0	3.84	3.4	3.4	3	3.84	3.84	3.84	3.93	3.84	0	0	0	0	3.98	0	1.6	1.84
20	3	0	0	0.84	1.84	0	0	0.24	0	3.84	0.44	3.84	0.09	3.93	0	2.6	3.4	3.4	3	3.84	3.84	1.84	3.93	3.84	0	0	0	0	0.98	0	0	0.84
25	0	0	0	0	0.44	0	0	0	0	3.84	0	0.84	0	0	0	0.44	1.4	0	0	1.84	0	0.84	0.03	3.84	0	0	0	0	0.14	0	0	0.44
30	0	0	0	0	0.24	0	0	0	0	3.84	0	0	0	0	0	0	0.4	0	0	0	0	0.44	0	1.24	0	0	0	0	0	0	0	0
35	0								0	0.44	0	0	0	0	0	0	0	0	0		0	0	0	0.44	0	0	0	0	0	0	0	0
40	0								0	0	0	0	0	0	0	0	0	0	0		0	0	0	0
45	0																0	0	0		0	0	0	0
50	0																0		0		0	0	0
Thermal recovery
Time (min)	Lido								+ZD7288								+CPZ								+CPZ+forskolin
-5	4.2	2.8	4.5	2.7	2.6	4.1	1.4	3.1	4	4.5	3.8	3.1	3.2	4.5	4.2	4	5.1	3.8	3.6	4.5	5.4	5.3	3.4	5.2	5.3	2.8	2.8	5.4	4.1	5.2	4.8	6.2
0	10.1	10.1	10.1	10.1	10.1	10.1	10.1	10.1	10.1	10.1	10.1	10.1	10.1	10.1	10.1	10.1	10.1	10.1	10.1	10.1	10.1	10.1	10.1	10.1	10.1	10.1	10.1	10.1	10.1	10.1	10.1	10.1
5	10.1	10.1	10.1	10.1	10.1	10.1	10.1	10.1	10.1	10.1	10.1	10.1	10.1	10.1	10.1	10.1	10.1	10.1	10.1	10.1	10.1	10.1	10.1	10.1	10.1	10.1	10.1	10.1	10.1	10.1	10.1	10.1
10	10.1	10.1	10.1	10.1	10.1	10.1	10.1	10.1	10.1	10.1	10.1	10.1	10.1	10.1	10.1	10.1	10.1	10.1	10.1	10.1	10.1	10.1	10.1	10.1	10.1	8.2	7.7	10.1	10.1	10.1	10.1	10.1
15	10.1	8.3	10.1	7.9	10.1	10.1	10.1	7.4	9.4	8.8	10.1	10.1	10.1	10.1	10.1	10.1	10.1	10.1	10.1	10.1	10.1	10.1	10.1	10.1	10.1	8.2	8.1	8.2	10.1	10.1	10.1	10.1
20	10.1	5.7	10.1	1.4	10.1	10.1	10.1	1.5	7.5	3.1	10.1	10.1	10.1	10.1	10.1	10.1	10.1	10.1	10.1	10.1	10.1	10.1	10.1	10.1	6.1	7.2	6.1	7	10.1	10.1	10.1	10.1
25	8.4	1.9	1.8	1.4	1.5	2.2	10.1	1.5	6.5	3.1	10.1	10.1	10.1	10.1	4.4	9.3	10.1	10.1	10.1	10.1	10.1	10.1	10.1	10.1	5.6	2.8	5.2	5.5	3.9	10.1	2.1	3.6
30	5.6	1.9	1.8	1.4	1.5	2.2	6.8	1.5	5.2	3.1	10.1	1.1	10.1	10.1	1.9	3.5	10.1	6.6	10.1	9.7	10.1	10.1	7.2	8.1	6.1	2.8	1.2	5.5	3.9	9.4	2.1	3.6
35									5.2	3.1	6.8	1.1	4.5	10.1	1.9	3.5	3.8	9.4	2.2	2.7	1.7	7.9	4.5	5.6	5.6	2.8	1.2	5.5	3.9	5.9	2.1	3.6
40									5.2	3.1	1.6	1.1	4.5	8.2	1.9	3.5	3.8	7.6	2.2	2.7	1.7	8.2	4.5	5.6
45									5.2	3.1	1.6	1.1	4.5	2.6	1.9	3.5	3.8	7.9	2.2	2.7	1.7	8.1	4.5	5.6
50																	3.8	4.7	2.2	2.7	1.7	4.6	4.5	5.6
