# Supplementary material for: Capsazepine prolongation of the duration of lidocaine block of sensory transmission in mice may be mediated by modulation of HCN channel currents
Source: PeerJ. 2019 Jun 13;7:e7111. doi: 10.7717/peerj.7111 (PMC6571133; doi:10.7717/peerj.7111)
Supplement: Supplemental Information 3 — CPZ (10 μM) showed no influence on INa in isolated mice DRG neurons, but high-concentration CPZ (30 μM) significantly inhibited current density of INa. 200 μM cAMP increased the current density of Ih. [file peerj-07-7111-s003.xlsx]

## Sheet: Na+
CPZ 10 uM
2019_03_01_0010	30.36 pF		2019_03_01_0015				2019_03_01_0020	32.50 pF		2019_03_01_0025				2019_03_01_0038	27.95 pF		2019_03_01_0044
-70	-30.5176		-70	-231.934			-70	-21.3623		-70	-25.0244			-70	-31.7383		-70	-21.3623
-60	-19.5312		-60	-267.334			-60	-27.4658		-60	-31.1279			-60	-20.752		-60	-20.1416
-50	-17.7002		-50	-206.909			-50	-20.1416		-50	-37.2314			-50	-1.83106		-50	-1.2207
-40	-0.610352		-40	-20.752			-40	-21.3623		-40	-21.3623			-40	4.27246		-40	17.7002
-30	-25.6348		-30	27.4658			-30	-45.166		-30	-31.1279			-30	21.3623		-30	25.0244
-20	-341.797		-20	-173.95			-20	-361.328		-20	-280.762			-20	-90.9424		-20	-162.964
-10	-1695.56		-10	-413.818			-10	-1875.61		-10	-1288.45			-10	-1174.32		-10	-1585.08
0	-10604.9		0	-2669.68			0	-5076.9		0	-3271.48			0	-6348.88		0	-7534.79
10	-12208.9	-402.136	10	-5626.22	-185.317		10	-6998.9	-215.351	10	-4874.88	-149.996		10	-7904.66	-282.814	10	-8783.57	-314.26
20	-11151.7		20	-5189.21			20	-7206.42		20	-5679.93			20	-7167.97		20	-7989.5
30	-9260.86		30	-4031.98			30	-6563.11		30	-5231.93			30	-5975.34		30	-6607.06
40	-7013.55		40	-2556.76			40	-5258.18		40	-4284.06			40	-4446.41		40	-4878.54
50	-4475.71		50	-351.562			50	-3505.25		50	-2911.38			50	-2608.03		50	-2875.98
60	-1737.67		60	933.838			60	-1373.9		60	-1224.98			60	-651.855		60	-706.177
70	809.326		70	1318.97			70	700.073		70	125.122			70	478.516		70	767.212
2019_03_01_0062	22.85 pF		2019_03_01_0069				2019_03_01_0085	23.99 pF		2019_03_01_0093				2019_03_01_0142	33.79 pF		2019_03_01_0149
-70	-8.54492		-70	-19.5312			-70	-27.4658		-70	-26.8555			-70	-25.0244		-70	-25.0244
-60	-23.8037		-60	-17.7002			-60	-19.5312		-60	-18.9209			-60	-23.1934		-60	-22.583
-50	-12.207		-50	-20.752			-50	-9.76562		-50	-1.83106			-50	-44.5557		-50	-15.8691
-40	0.610352		-40	-6.10352			-40	-1.83106		-40	18.9209			-40	-35.4004		-40	-14.6484
-30	-29.9072		-30	-35.4004			-30	15.8691		-30	11.5967			-30	-41.5039		-30	-32.3486
-20	-337.524		-20	-555.42			-20	-29.2969		-20	-127.563			-20	-244.141		-20	-447.998
-10	-1950.68		-10	-2634.89			-10	-411.377		-10	-1160.89			-10	-6812.13		-10	-9746.7
0	-6130.37		0	-8580.32			0	-2438.96		0	-4032.59			0	-7499.39		0	-10214.8
10	-10310.7	-451.233	10	-10550.5	-461.73		10	-3649.9	-152.143	10	-4401.86	-183.487		10	-6851.81	-202.776	10	-8757.93	-259.187
20	-9172.36		20	-9414.67			20	-3242.8		20	-3929.44			20	-5707.4		20	-7485.35
30	-7414.55		30	-7680.05			30	-2534.18		30	-2961.43			30	-4472.66		30	-5787.35
40	-5395.51		40	-5776.37			40	-1694.95		40	-1964.11			40	-3422.24		40	-4185.18
50	-3201.9		50	-3623.66			50	-715.942		50	-914.917			50	-2340.09		50	-2719.12
60	-949.097		60	-1479.49			60	265.503		60	349.121			60	-861.206		60	-1288.45
70	978.394		70	216.064			70	597.534		70	1221.92			70	-100.708		70	-64.0869
2019_03_02_0013	19.21 pF		2019_03_02_0020				2019_03_02_0034	37.65 pF		2019_03_02_0041				2019_03_02_0050	23.9 pF		2019_03_02_0057
-70	-21.3623		-70	-18.9209			-70	-34.79		-70	-27.4658			-70	-36.0107		-70	-34.1797
-60	-14.6484		-60	-17.0898			-60	-20.752		-60	-20.1416			-60	-23.1934		-60	-29.2969
-50	-6.10352		-50	-7.93457			-50	-15.2588		-50	-7.93457			-50	-28.0762		-50	-39.0625
-40	-8.54492		-40	-6.10352			-40	0.610352		-40	10.376			-40	-25.0244		-40	-14.0381
-30	-48.8281		-30	-85.4492			-30	20.1416		-30	4.27246			-30	-15.2588		-30	-13.4277
-20	-236.816		-20	-391.846			-20	-87.2803		-20	-202.637			-20	-279.541		-20	-78.7354
-10	-734.253		-10	-1109.62			-10	-818.481		-10	-1615.6			-10	-1501.46		-10	-393.677
0	-1641.85		0	-1812.74			0	-13804.3		0	-15990.6			0	-3564.45		0	-1340.33
10	-2026.98	-105.517	10	-2277.22	-118.544		10	-13916.6	-369.632	10	-15734.9	-417.925		10	-3699.95	-154.81	10	-2084.96	-87.2369
20	-1931.15		20	-2146			20	-11788.9		20	-13477.8			20	-3280.64		20	-2165.53
30	-1631.47		30	-1804.81			30	-9409.79		30	-10833.7			30	-2472.53		30	-1819.46
40	-1221.92		40	-1349.49			40	-6853.64		40	-7968.75			40	-1651.61		40	-1372.07
50	-684.204		50	-800.171			50	-4155.27		50	-4966.43			50	-685.425		50	-773.315
60	-253.296		60	-338.135			60	-1378.78		60	-1876.22			60	199.585		60	-12.207
70	104.98		70	97.0459			70	844.727		70	778.198			70	283.813		70	130.005
2019_03_02_0075	17.56 pF		2019_03_02_0082				2019_03_02_0103	27.15 pF		2019_03_02_0110
-70	-13.4277		-70	-21.3623			-70	-29.9072		-70	-25.6348
-60	-16.4795		-60	-17.7002			-60	-25.6348		-60	-21.9727
-50	-17.7002		-50	-15.2588			-50	-20.752		-50	-19.5312
-40	-11.5967		-40	-13.4277			-40	-41.5039		-40	-37.8418
-30	-7.93457		-30	-17.0898			-30	-306.396		-30	-346.069
-20	-54.3213		-20	-217.285			-20	-3687.13		-20	-4148.56
-10	-454.102		-10	-1100.46			-10	-8631.59		-10	-9501.95
0	-1444.7		0	-3256.84			0	-8773.19		0	-9744.87
10	-3480.83	-198.225	10	-4543.46	-258.739		10	-7626.95	-280.919	10	-8502.81	-313.179
20	-3751.83		20	-4195.56			20	-6338.5		20	-7033.08
30	-3249.51		30	-3461.3			30	-4879.15		30	-5489.5
40	-2556.15		40	-2639.16			40	-3411.87		40	-3920.9
50	-1597.9		50	-1665.04			50	-2178.34		50	-2465.21
60	-548.706		60	-584.106			60	-1047.97		60	-1129.15
70	292.358		70	213.623			70	53.1006		70	112.305
CPZ 30 uM
2019_03_22_0061	17.60 pF		2019_03_22_0062			2019_03_22_0063	20.47 pF		2019_03_22_0064			2019_03_22_0071	25.87 pF		2019_03_22_0072			2019_03_22_0068	20.71 pF		2019_03_22_0069
-70	-21.3623		-70	-28.6865		-70	-23.1934		-70	-20.752		-70	-24.4141		-70	-23.8037		-70	-32.3486		-70	-22.583
-60	-18.3105		-60	-25.6348		-60	-23.1934		-60	-21.9727		-60	-18.3105		-60	-18.9209		-60	-23.1934		-60	-25.0244
-50	-25.6348		-50	-25.6348		-50	-22.583		-50	-17.7002		-50	-15.2588		-50	-10.9863		-50	-28.6865		-50	-26.2451
-40	-33.5693		-40	-25.0244		-40	-60.4248		-40	-26.8555		-40	-40.8936		-40	-19.5312		-40	-71.4111		-40	-40.2832
-30	-76.9043		-30	-42.1143		-30	-440.063		-30	-89.7217		-30	-113.525		-30	-72.0215		-30	-679.932		-30	-238.037
-20	-264.282		-20	-113.525		-20	-2733.15		-20	-477.905		-20	-549.316		-20	-364.99		-20	-2701.42		-20	-817.261
-10	-1932.98		-10	-1166.99		-10	-3265.38		-10	-851.44		-10	-1174.32		-10	-725.708		-10	-3074.95		-10	-1047.97
0	-4343.26		0	-3317.26		0	-3037.72		0	-958.252		0	-1393.43		0	-811.768		0	-2876.59		0	-1062.62
10	-3901.98	-221.703	10	-2979.74	-169.303	10	-2590.94	-126.573	10	-853.271	-41.684	10	-1271.36	-49.1443	10	-724.487	-28.0049	10	-2521.97	-121.776	10	-983.276	-47.4783
20	-3398.44		20	-2517.7		20	-2120.36		20	-742.798		20	-1096.19		20	-576.172		20	-2135.01		20	-897.217
30	-2897.34		30	-2124.63		30	-1717.53		30	-616.455		30	-855.103		30	-519.409		30	-1767.58		30	-787.964
40	-2365.72		40	-1737.06		40	-1340.94		40	-549.927		40	-608.521		40	-487.671		40	-1425.17		40	-632.324
50	-1890.26		50	-1354.98		50	-1021.12		50	-508.423		50	-424.805		50	-448.608		50	-1127.93		50	-544.434
60	-1391.6		60	-1014.4		60	-751.343		60	-477.295		60	-262.451		60	-487.671		60	-813.599		60	-426.025
70	-965.576		70	-712.28		70	-540.161		70	-471.191		70	-139.16		70	-462.646		70	-615.234		70	-289.307
2019_03_22_0075	17.13 pF		2019_03_22_0076			2019_03_22_0078	19.29 pF		2019_03_22_0079			2019_03_22_0082	21.75 pF		2019_03_22_0083
-70	-23.8037		-70	-28.6865		-70	-18.3105		-70	-14.0381		-70	-25.0244		-70	-14.6484
-60	-15.8691		-60	-21.3623		-60	-14.6484		-60	-18.3105		-60	-18.9209		-60	-15.8691
-50	-21.3623		-50	-26.8555		-50	-15.8691		-50	-18.3105		-50	-20.1416		-50	-17.0898
-40	-26.2451		-40	-25.6348		-40	-31.7383		-40	-40.2832		-40	-28.6865		-40	-17.7002
-30	-32.959		-30	-79.3457		-30	-439.453		-30	-264.282		-30	-100.098		-30	-47.6074
-20	-99.4873		-20	-76.9043		-20	-2593.99		-20	-1731.57		-20	-556.641		-20	-230.713
-10	-275.879		-10	-148.315		-10	-2642.21		-10	-2490.23		-10	-1317.75		-10	-553.589
0	-562.744		0	-277.71		0	-2415.16		0	-2468.87		0	-1590.58		0	-989.38
10	-671.387	-39.1936	10	-435.181	-25.4046	10	-2126.46	-110.237	10	-2218.02	-114.983	10	-1575.32	-72.4284	10	-1105.35	-50.8205
20	-675.659		20	-446.777		20	-1768.8		20	-1903.08		20	-1445.31		20	-1019.29
30	-611.572		30	-397.949		30	-1479.49		30	-1544.8		30	-1290.28		30	-869.141
40	-520.02		40	-357.666		40	-1270.14		40	-1242.07		40	-1093.14		40	-708.618
50	-415.039		50	-384.521		50	-1049.19		50	-955.2		50	-880.127		50	-545.044
60	-293.579		60	-449.219		60	-808.105		60	-715.332		60	-654.907		60	-375.977
70	-180.664		70	-496.216		70	-633.545		70	-488.892		70	-422.974		70	-346.68
		Sodium-10 cpz	Control	10 μM CPZ
			-402.136	-185.317
			-451.233	-461.73
			-105.517	-118.544
			-198.225	-258.739
			-215.351	-149.996
			-152.143	-183.487
			-369.632	-417.925
			-280.919	-313.179
			-282.814	-314.26
			-202.776	-259.187
			-154.81	-87.2369
		Sodium-30 cpz	Control	30 μM CPZ
			-221.703	-169.303
			-39.1936	-25.4046
			-126.573	-41.684
			-110.237	-114.983
			-49.1443	-28.0049
			-72.4284	-50.8205
			-121.776	-47.4783

## Sheet: HCN
CPZ (10 uM)
		22.85 pF			20.45 pF			33.79 pF			19.21 pF			37.65 pF			23.90 pF			17.56 pF			27.15 pF			18.76 pF
-120 mV	2019_03_01_0058.abf	-44.6345		2019_03_01_0096.abf	-87.7466		2019_03_01_0131.abf	-72.9659		2019_03_02_0002.abf	-53.1994		2019_03_02_0023.abf	-83.7586		2019_03_02_0045.abf	-6.72412		2019_03_02_0062.abf	-28.9416		2019_03_02_0091.abf	-313.696		2019_03_03_0007.abf	-50.4503
	2019_03_01_0065.abf	-14.4295		2019_03_01_0104.abf	-66.4606		2019_03_01_0138.abf	-62.6034		2019_03_02_0009.abf	-29.5332		2019_03_02_0030.abf	-40.1984		2019_03_02_0053.abf	3.07455		2019_03_02_0071.abf	-41.8093		2019_03_02_0099.abf	-233.997		2019_03_03_0012.abf	-25.5325
内液有200 uM cAMP
CPZ (10 uM)
		29.80 pF			23.59 pF			15.95 pF			16.51 pF			15.33 pF			26.96 pF			10.55 pF			11.26 pF			8.943 pF			22.83 pF			14.78 pF			16.5 pF
-120 mV	2019_03_03_0021.abf	-390.767		2019_03_03_0028.abf	-44.816		2019_03_05_0002.abf	-59.3034		2019_03_05_0012.abf	-103.647		2019_03_05_0026.abf	-75.4304		2019_03_05_0037.abf	-89.167		2019_03_05_0044.abf	-279.579		2019_03_05_0050.abf	-29.328		2019_03_12_0000.abf	-32.0625		2019_03_12_0048.abf	-51.7081		2019_03_12_0055.abf	-31.0856		2019_03_12_0060.abf	-94.7878
	2019_03_03_0025.abf	-441.447		2019_03_03_0033.abf	-96.3634		2019_03_05_0007.abf	-39.4276		2019_03_05_0016.abf	-94.065		2019_03_05_0031.abf	-60.5667		2019_03_05_0041.abf	-312.738		2019_03_05_0047.abf	-206.748		2019_03_05_0054.abf	-30.1313		2019_03_12_0005.abf	-68.2337		2019_03_12_0052.abf	-51.8192		2019_03_12_0058.abf	-64.343		2019_03_12_0064.abf	-97.8625
	Ih	CPZ+0 cAMP	CPZ+200 cAMP
		-1.95337	-13.113
		-2.15939	-3.71808
		-2.22466	-6.27783
		-0.28134	-4.92044
		-4.29079	-26.5004
		-2.76936	-3.60462
		-1.63975	-4.58521
		-2.68925	-4.10322
			-5.74472
			-3.30738
	CPZ inhibition	CPZ+0 cAMP	CPZ+200 cAMP
		-0.63149	-14.8137
		-0.32499	-4.08493
		-1.85272	-2.47195
		-1.53739	-5.69746
		-1.06769	-3.95086
		0.128642	-11.6001
		-2.38094	-19.597
		-1.36101	-2.67596
			-7.62984
			-2.26979
			-4.35338
			-5.93106
