# Supplementary material for: Capsazepine prolongation of the duration of lidocaine block of sensory transmission in mice may be mediated by modulation of HCN channel currents
Source: PeerJ. 2019 Jun 13;7:e7111. doi: 10.7717/peerj.7111 (PMC6571133; doi:10.7717/peerj.7111)
Supplement: Supplemental Information 4 — CPZ at 10 μM or 30 μM did not inhibit CAP amplitudes in mice sciatic nerves. However, CPZ at 10 μM and/or 30 μM enhanced the inhibitory effect of 1% lidocaine on CAP amplitudes. [file peerj-07-7111-s004.xlsx]

## Sheet: CAP
10 CPZ-CAP
baseline	7.89	9.11	9.11	7.23	5.69	6.97	5.21		7.31571
10 CPZ	7.35	7.43	5.89						6.89
baseline	6.69	10.92							8.805
10 CPZ	9.74	8.84	10.39	8.59	10.44	11.95			9.99167
baseline	8.74	8.05							8.395
10 CPZ	8.91	7.78							8.345
30 CPZ-CAP
baseline	0.86	1.04	0.49	0.58	0.97						0.788
30 CPZ	0.64	0.8	0.96								0.8
baseline	3.26	3.85	4.17	3.19	3.65	1.13	1.41	2.52	2.07		2.80556
30 CPZ	3.13	3.04	3.84	3.43	4.89	4.34	3.52				3.74143
baseline	6.15	6.25									6.2
30 CPZ	6.24	6.36									6.3
	CPZ-CAP
			10 CPZ-CAP			30 CPZ-CAP
		7.31571	6.89		0.788	0.8
		8.395	8.345		6.2	6.3
		8.805	9.99167		2.80556	3.74143
1%lido-CAP
baseline	12.01	12.15	10.45	11.98		11.6475
1%lido	4.86	2.48				0.417257
baseline	12.17	11.88	12.19			12.08
1%lido	4.99	4.82	4.75			0.402318
baseline	11.54	10.09	12.02			11.215
1%lido	5.08	4.34	5.17			0.433348
baseline	8.69	8.27	8.79			8.58333
1%lido	3.74	3.72	5.15			0.488579
baseline	10.09	10.26	10.17			10.1733
1%lido	4.14	4.47	4.38			0.425652
1%lido+10 CPZ-CAP
baseline	6.74	7.45	7.03			7.07333
1%lido+10 CPZ	1.55	1.84	1.73			0.241015
baseline	8.74	8.05	6.85			7.88
1%lido+10 CPZ	2.01	1.76	1.62			0.228426
baseline	5.72	5.97	5.37			5.68667
1%lido+10 CPZ	0.78	0.88	0.83			0.145173
1%lido+30 CPZ-CAP
baseline	7.73	7.58	7.83			7.71333
1%lido+30 CPZ	1	0.9	0.98			0.124626
baseline	8.96	9.03	9.14			9.04333
1%lido+30 CPZ	1.16	0.92	0.97			0.112676
baseline	12.04	11.78	12.35			12.0567
1%lido+30 CPZ	1.32	1.77	1.48			0.13941
	1%lido	0.417257	0.402318	0.433348	0.488579	0.425652
	1%lido+10 cpz	0.241015	0.228426	0.145173
	1%lido+30 cpz	0.124626	0.112676	0.13941
